# Supplementary material for: Sirt1/Nrf2 pathway is involved in oocyte aging by regulating Cyclin B1
Source: PubMed Central journal article supplement (PMC6224227; doi:10.18632/aging.101609), 2018-10-27
Supplement: aging-10-101609-s001.pdf [file aging-10-101609-s001.pdf]

**SUPPLEMENTARY FIGURES**

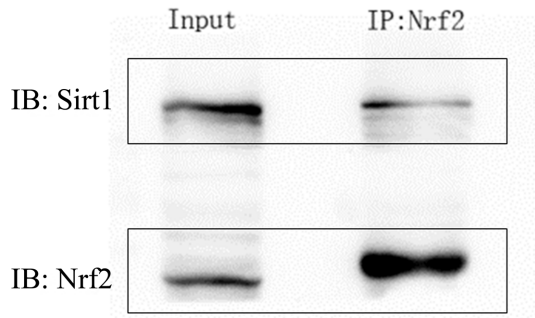

**Figure S1. The CO-IP of Nrf2 and Sirt1 in mouse ovarian tissues.** Ovarian tissue extracts were immunoprecipitated with anti-Nrf2 protein antibody and immunoblots were probed with anti-Sirt1 antibody. The “input” panel shows target proteins prior to immunoprecipitation in the extracts.

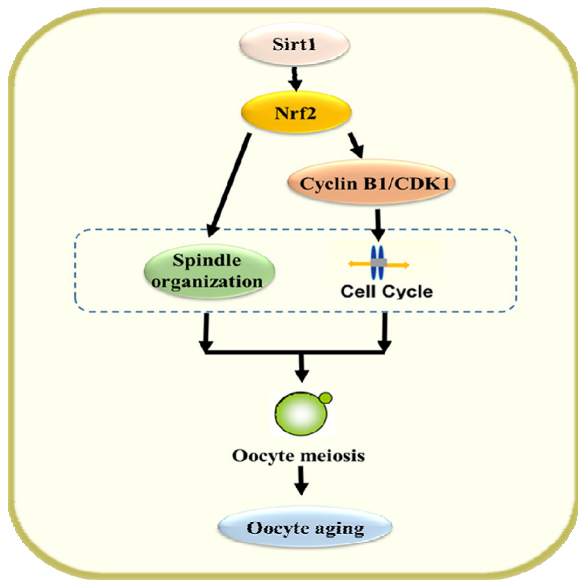

**Figure S2. Summary of Nrf2-related events during mouse oocyte maturation.** Nrf2 can control polar body extrusion by organizing microtubules and cell cycle that is regulated via the Sirt1-Nrf2-Cyclin B1 signaling pathway.

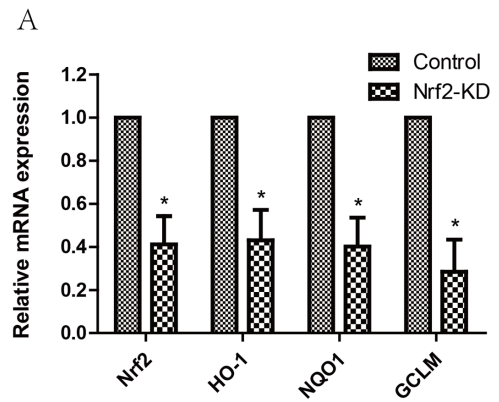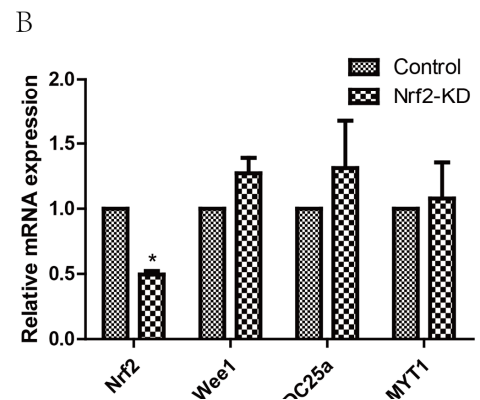

**Figure S3. Effects of Nrf2 knockdown on downstream genes.** (A) Nrf2 knockdown causes the reduction of HO-1, NQO-1 and GCLM. (B) No significant difference in the expression of Wee1, CDC25A and MYT1 between control and Nrf2-KD oocytes. Bars represent the mean ± SD. \*P<0.05 vs. controls.
