# Supplementary material for: Sirt1/Nrf2 pathway is involved in oocyte aging by regulating Cyclin B1
Source: publisher site journal article supplement (doi:10.18632/aging.101609), 2018-10-27
Supplement: Supplementary file [file aging-v10i10-101609-supplementary-material-SD2.pdf]

## SUPPLEMENTARY TABLES

**Table S1. siRNA sequence.**

| siRNA Sequence of Nrf2  |                              |
|-------------------------|------------------------------|
| Nrf2-siRNA-1            | 5' CCGAAUUACAGUGUCUUAATT 3'  |
|                         | 5' UUAAGACACUGAAUUCGGTT 3'   |
| Nrf2-siRNA-2            | 5' CGAGAAGUGUUUGACUUUATT 3'  |
|                         | 5' UAAAGUCAAAACACUUCUCGTT 3' |
| Nrf2-siRNA-3            | 5' GCACAAUGGAAUCAAUGATT 3'   |
|                         | 5' UCAUUGAAUCCAUGUGCTT 3'    |
| siRNA Sequence of Sirt1 |                              |
| Sirt1-siRNA-1           | 5' GCGGAUAGGUCCAUAUACUTT 3'  |
|                         | 5' AGUAUAUGGACCUAUCCGCTT 3'  |
| Sirt1-siRNA-2           | 5' CCGUCUCUGUGUCACAAAUTT 3'  |
|                         | 5' AUUUGUGACACAGAGACGGTT 3'  |
| Sirt1-siRNA-3           | 5' GGAUCAAGAGGUUGUUAATT 3'   |
|                         | 5' UUAACAACCUCUUGAUCCCTT 3'  |

**Table S2. Primer sequences.**

| Mouse primer sequences |                         |                         |
|------------------------|-------------------------|-------------------------|
| Gene                   | Forward primer          | Reverse primer          |
| Nrf2                   | GTCTTCACTGCCCCTCATC     | TCGGGAATGGAAAATAGCTCC   |
| GAPDH                  | TCTTGCTCAGTGTCCTTGC     | CTTTGTCAAGCTCATTTCTGG   |
| Sirt1                  | CTCTGAAAGTGAGACCAGTAGC  | TGTAGATGAGGCAAAGGTTCC   |
| Cyclin B1              | CTGACCCAAACCTCTGTAGTG   | CCTGTATTAGCCAGTCAATGAGG |
| CDK1                   | ACAAAGGAACAATCAAACCTGGC | AGCAACACTTCTGGAGATCG    |
| Keap1                  | CTCCGCAGAATGTTACTATCCAG | ACACTGTTCAACTGGTCCTG    |
| Nrf1                   | AATGTCCGCAGTGATGTCC     | GCCTGAGTTTGTGTTTGCTG    |
| Human primer sequences |                         |                         |
| Gene                   | Forward primer          | Reverse primer          |
| Nrf2                   | AAACCACCCTGAAACGACAG    | AGCGGCTTGAATGTTTGTGTC   |
| GAPDH                  | ACATCGCTCAGACACCATG     | TGTAGTTGAGGTCAATGAAGGG  |
